# Supplementary material
Source: PubMed Central journal article supplement (PMC9247823)
Supplement: mmc1.pdf [file mmc1.pdf]

**Supplemental information**

**Integration of rare expression outlier-associated  
variants improves polygenic risk prediction**

**Craig Smail, Nicole M. Ferraro, Qin Hui, Matthew G. Durrant, Matthew Aguirre, Yosuke Tanigawa, Marissa R. Keever-Keigher, Abhiram S. Rao, Johanne M. Justesen, Xin Li, Michael J. Gloudemans, Themistocles L. Assimes, Charles Kooperberg, Alexander P. Reiner, Jie Huang, Christopher J. O'Donnell, Yan V. Sun, Million Veteran Program, Manuel A. Rivas, and Stephen B. Montgomery**

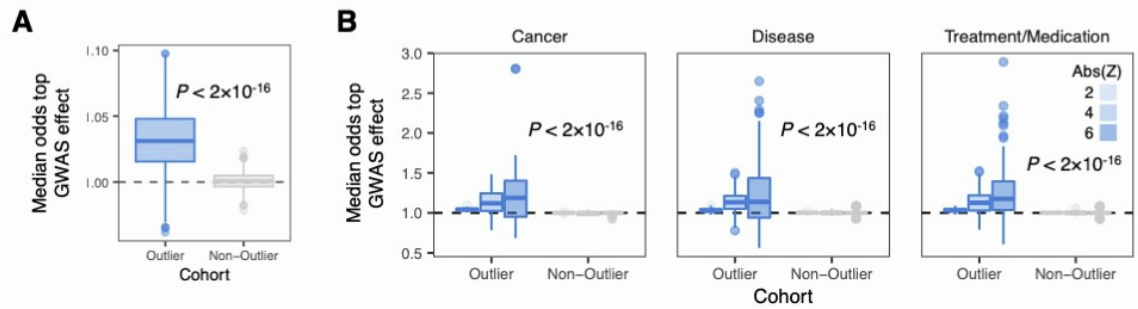

**Supplementary Figure 1. A.** Distribution of median odds across permutations for selected UKB phenotypes comparing GWAS effect estimates for outlier-associated variants compared with non-outlier variants (blue) and non-outlier variants only (gray). P-value from Wilcoxon test. **B.** Distribution of median odds across permutations for selected UKB GWAS phenotypes subdivided in to meta-categories (cancer; disease (non-cancer); treatment/medication) comparing GWAS effect estimates for outlier-associated variants compared with non-outlier variants (blue) and non-outlier variants only (gray). The analysis was repeated at more extreme thresholds of outlier gene expression abs(Z-score). P-values from Wilcoxon test.

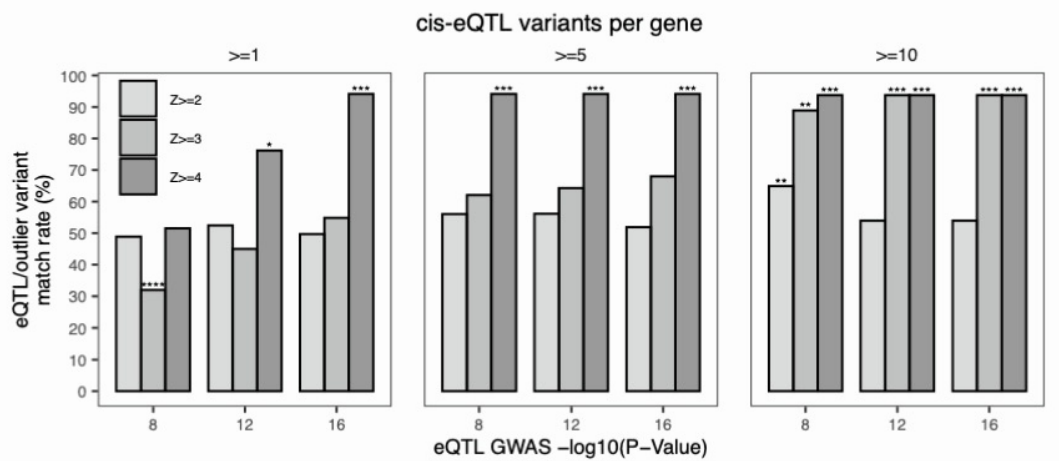

**Supplementary Figure 2.** Rate of concordance between cis-eQTL and outlier-associated variants per gene, matched on cis-eQTL slope/outlier direction and GWAS effect direction (risk/protective) and stratified by cis-eQTL GWAS P-Value, number of cis-eQTL variants per gene, and outlier gene expression abs(Z-score). P-values obtained from Binomial test.

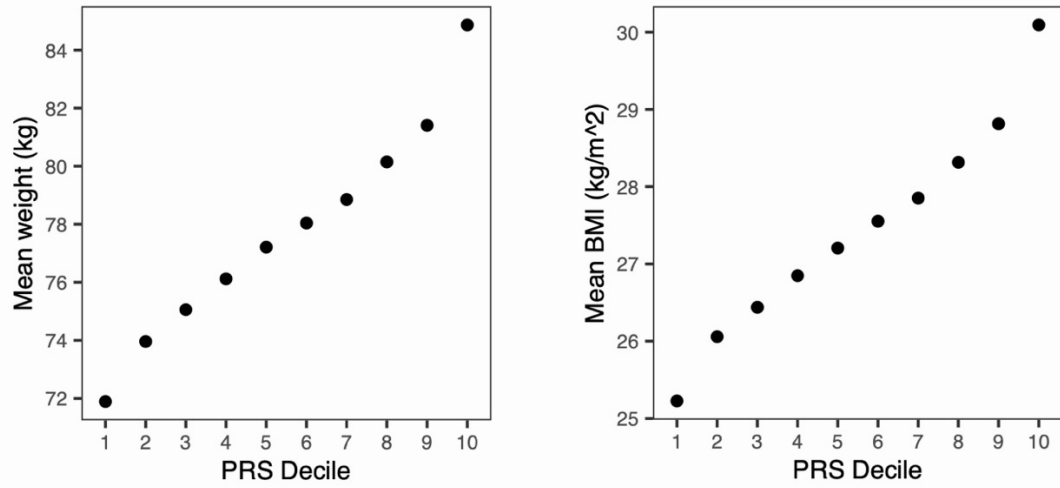

**Supplementary Figure 3.** Mean weight (left) and BMI (right) observed in UKB validation cohort across deciles of a polygenic risk score for BMI.

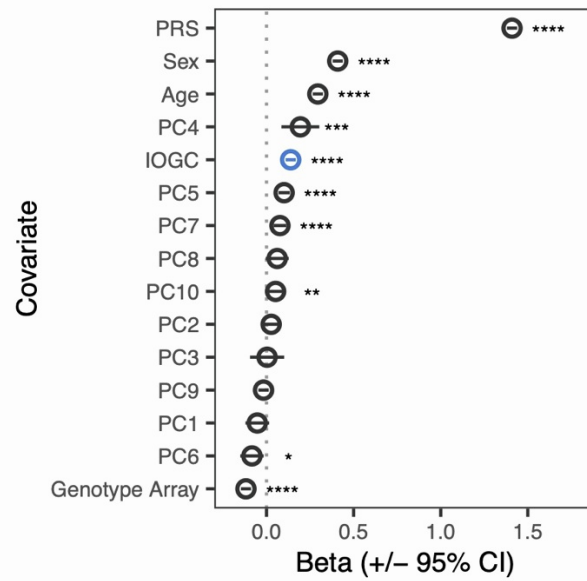

**Supplementary Figure 4.** Linear regression coefficients from a model testing the effect of IOGC score (blue circle) on BMI in UKB, adjusting for the effects of PRS, sex, age, genotype array, and first 10 principal components of ancestry (black circles). All predictors were scaled (mean=0 and variance=1) and ordered by their regression coefficient estimate to aid visual comparison. P-values obtained from linear regression.

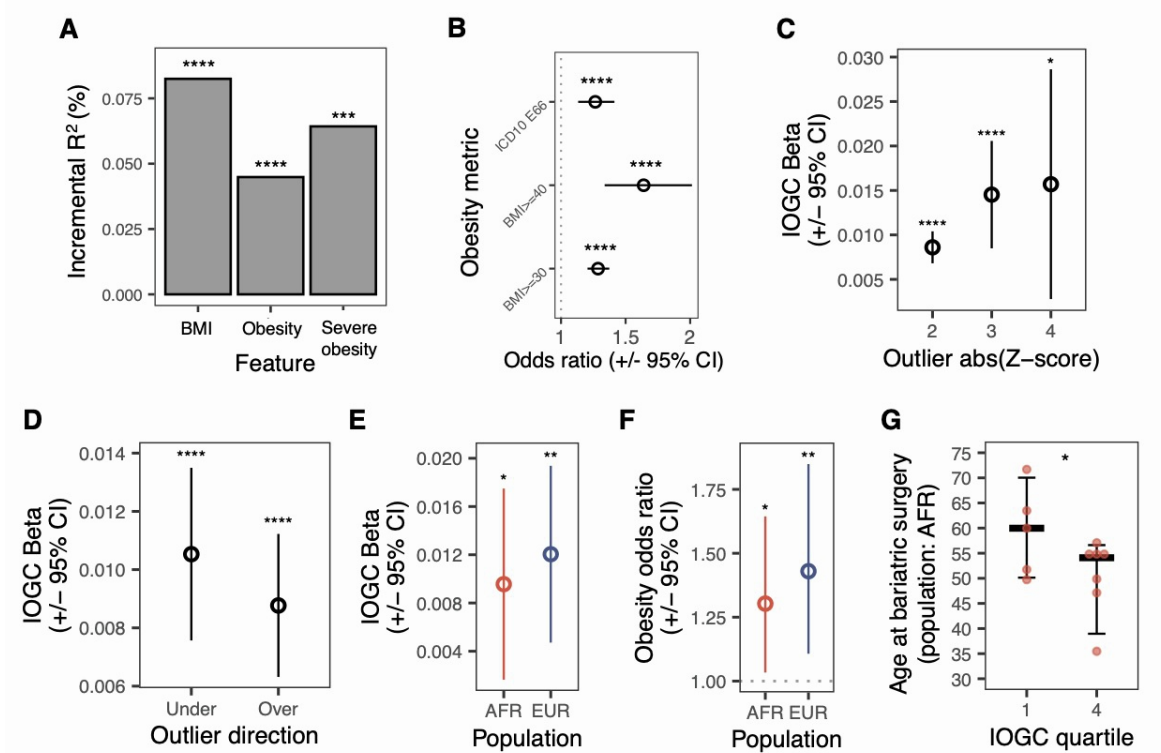

**Supplementary Figure 5. A.** Incremental R<sup>2</sup> for BMI, obesity (BMI≥30 kg/m<sup>2</sup>) and severe obesity (BMI≥40 kg/m<sup>2</sup>) observed when adding IOGC to a regression model controlling for PRS, age, sex, principal components of ancestry 1-10, and genotyping array in UKB validation cohort. P-values obtained from ANOVA tests. **B.** Odds ratios for obesity (BMI≥30 kg/m<sup>2</sup>), diagnostic history of obesity (ICD-10 code E66), and severe obesity (BMI≥40 kg/m<sup>2</sup>) comparing individuals in top and bottom 10% of IOGC score. P-values obtained from Fisher's Exact Test. **C.** IOGC regression coefficients across more extreme gene expression outlier Z-scores. P-values obtained from linear regression. **D.** IOGC regression coefficients for under-expression and over-expression outlier-associated variants. P-values obtained from linear regression. **E.** Regression coefficients across two distinct ancestry groups in UKB, directly modeling the effect of IOGC on BMI in UKB individuals with self-reported African ancestry (N=6,459) (AFR, red) compared with a matched number of randomly sampled UKB non-British White individuals (EUR, blue). P-values obtained from linear regression. **F.** Odds ratios for obesity (BMI≥30 kg/m<sup>2</sup>) comparing individuals in top and bottom 10% of IOGC score for same cohorts described in (E.). P-values obtained from Fisher's Exact Test. **G.** Age at bariatric surgery for top and bottom 25% of IOGC score among AFR cohort individuals described in (E.). Crossbars indicate median, error bars indicate 90% of data range. P-value obtained from T-test.

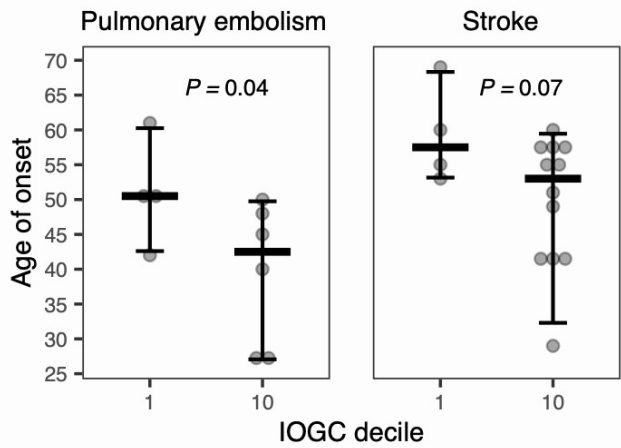

**Supplemental Figure 6.** Age at time pulmonary embolism (left) or stroke (right) was diagnosed for individuals classified as severely obese (BMI $\geq$ 40 kg/m<sup>2</sup>) and in the top or bottom 10% of IOGC score. Crossbars indicate median, error bars indicate 90% of data range.

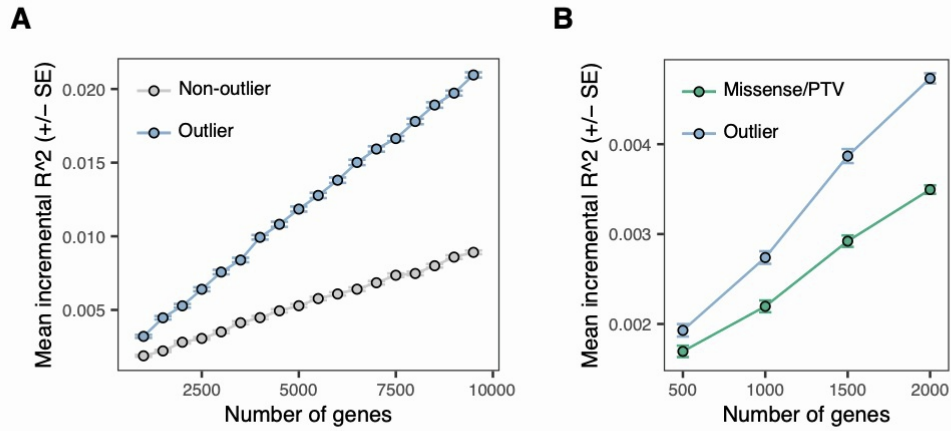

**Supplementary Figure 7. A.** Mean Incremental  $R^2$  (%) resulting from adding IOGC to a regression model predicting BMI and controlling for PRS, age, sex, principal components of ancestry 1-10, and genotyping array. IOGC was calculated using outlier-associated (blue) or non-outlier (gray) variants across permutations of progressively larger gene sets. **B.** Following the same procedure as in (A.) for missense variants or PTVs matched on minor allele frequency of outlier-associated variants in intersecting genes.



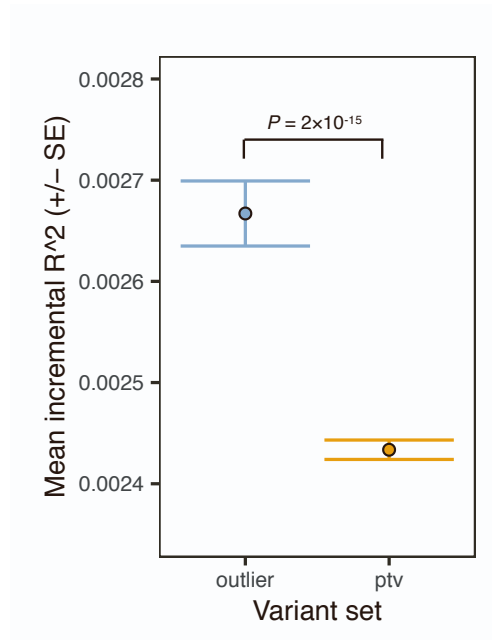

**Supplementary Figure 8.** Mean Incremental R<sup>2</sup> (%) resulting from adding IOGC to a regression model predicting BMI and controlling for PRS, age, sex, principal components of ancestry 1-10, and genotyping array. IOGC was calculated separately for outlier-associated variants (blue) and PTVs (yellow) across permutations in the intersecting gene set containing at least one variant from both categories. P-value obtained from Wilcoxon test.

**Table 1.** Area under receiver operator curve (AUROC) and area under prediction recall curve (AUPRC) across covariates-only, covariates+PRS and covariates+PRS+IOGC logistic regression models predicting obesity, severe obesity and age of onset for bariatric surgery

| Phenotype                                     | AUROC                 |                           |                           | AUPRC                 |                            |                           |
|-----------------------------------------------|-----------------------|---------------------------|---------------------------|-----------------------|----------------------------|---------------------------|
|                                               | Baseline <sup>1</sup> | +PRS                      | +PRS+IOGC                 | Baseline <sup>1</sup> | +PRS                       | +PRS+IOGC                 |
| Obesity<br>(BMI≥30 kg/m <sup>2</sup> )        | <b>0.5423</b><br>(NA) | <b>0.6575</b><br>(+21.2%) | <b>0.6581</b><br>(+0.09%) | <b>0.2717</b><br>(NA) | <b>0.3769</b><br>(+38.7%)  | <b>0.3781</b><br>(+0.28%) |
| Severe Obesity<br>(BMI≥40 kg/m <sup>2</sup> ) | <b>0.5870</b><br>(NA) | <b>0.7340</b><br>(+25.1%) | <b>0.7356</b><br>(+0.09%) | <b>0.0269</b><br>(NA) | <b>0.0603</b><br>(+224.0%) | <b>0.0610</b><br>(+1.06%) |
| Early onset<br>bariatric surgery <sup>2</sup> | <b>0.6937</b><br>(NA) | <b>0.6951</b><br>(+0.21%) | <b>0.7415</b><br>(+6.68%) | <b>0.6976</b><br>(NA) | <b>0.7002</b><br>(+0.37%)  | <b>0.7135</b><br>(+1.90%) |

<sup>1</sup> Baseline model: obesity = age + sex + PC1...PC10 + genotyping array; bariatric surgery = sex + PC1...PC10 + genotyping array

<sup>2</sup> Binary outcome: age at bariatric surgery ≤ cohort mean

**VA Million Veteran Program  
Core Acknowledgement for Publications  
Updated December 2021**

**MVP Program Office**

- Program Director - Sumitra Muralidhar, Ph.D.  
US Department of Veterans Affairs, 810 Vermont Avenue NW, Washington, DC 20420
- Associate Director, Scientific Programs - Jennifer Moser, Ph.D.  
US Department of Veterans Affairs, 810 Vermont Avenue NW, Washington, DC 20420
- Associate Director, Cohort Management & Public Relations - Jennifer E. Deen, B.S.  
US Department of Veterans Affairs, 810 Vermont Avenue NW, Washington, DC 20420

**MVP Executive Committee**

- Co-Chair: J. Michael Gaziano, M.D., M.P.H.  
VA Boston Healthcare System, 150 S. Huntington Avenue, Boston, MA 02130
- Co-Chair: Sumitra Muralidhar, Ph.D.  
US Department of Veterans Affairs, 810 Vermont Avenue NW, Washington, DC 20420
- Jean Beckham, Ph.D.  
Durham VA Medical Center, 508 Fulton Street, Durham, NC 27705
- Kyong-Mi Chang, M.D.  
Philadelphia VA Medical Center, 3900 Woodland Avenue, Philadelphia, PA 19104
- Philip S. Tsao, Ph.D.  
VA Palo Alto Health Care System, 3801 Miranda Avenue, Palo Alto, CA 94304
- Shiu-Wen Luoh, M.D., Ph.D.  
VA Portland Health Care System, 3710 SW US Veterans Hospital Rd, Portland, OR 97239  
US Department of Veterans Affairs, 810 Vermont Avenue NW, Washington, DC 20420
- Juan P. Casas, M.D., Ph.D., Ex-Officio  
VA Boston Healthcare System, 150 S. Huntington Avenue, Boston, MA 02130

**MVP Principal Investigators**

- J. Michael Gaziano, M.D., M.P.H.  
VA Boston Healthcare System, 150 S. Huntington Avenue, Boston, MA 02130
- Philip S. Tsao, Ph.D.  
VA Palo Alto Health Care System, 3801 Miranda Avenue, Palo Alto, CA 94304

**MVP Operations**

- MVP Executive Director – Juan P. Casas, M.D., Ph.D.  
VA Boston Healthcare System, 150 S. Huntington Avenue, Boston, MA 02130
- Director of Regulatory Affairs – Lori Churby, B.S.  
VA Palo Alto Health Care System, 3801 Miranda Avenue, Palo Alto, CA 94304
- MVP Cohort Management Director – Stacey B. Whitbourne, Ph.D.  
VA Boston Healthcare System, 150 S. Huntington Avenue, Boston, MA 02130
- MVP Recruitment/Enrollment Director - Jessica V. Brewer, M.P.H.  
VA Boston Healthcare System, 150 S. Huntington Avenue, Boston, MA 02130
- Director, VA Central Biorepository, Boston – Mary T. Brophy M.D., M.P.H.  
VA Boston Healthcare System, 150 S. Huntington Avenue, Boston, MA 02130
- Executive Director for MVP Biorepositories - Luis E. Selva, Ph.D.

- VA Boston Healthcare System, 150 S. Huntington Avenue, Boston, MA 02130
- MVP Informatics, Boston – Shahpoor (Alex) Shayan, M.S.
- VA Boston Healthcare System, 150 S. Huntington Avenue, Boston, MA 02130
- Director, MVP Data Operations/Analytics, Boston – Kelly Cho, M.P.H., Ph.D.
- VA Boston Healthcare System, 150 S. Huntington Avenue, Boston, MA 02130
- Director, Center for Computational and Data Science (C-DACS) & Genomics Core – Saiju Pyarajan Ph.D.
- VA Boston Healthcare System, 150 S. Huntington Avenue, Boston, MA 02130
- Director, Molecular Data Core – Philip S. Tsao, Ph.D.
- VA Palo Alto Health Care System, 3801 Miranda Avenue, Palo Alto, CA 94304
- Director, Phenomics Data Core – Kelly Cho, M.P.H, Ph.D.
- VA Boston Healthcare System, 150 S. Huntington Avenue, Boston, MA 02130
- Director, VA Informatics and Computing Infrastructure (VINCI) – Scott L. DuVall, Ph.D.
- VA Salt Lake City Health Care System, 500 Foothill Drive, Salt Lake City, UT 84148
- MVP Coordinating Centers
  - o Cooperative Studies Program Clinical Research Pharmacy Coordinating Center, Albuquerque – Todd Connor, Pharm.D.; Dean P. Argyres, B.S., M.S.  
New Mexico VA Health Care System, 1501 San Pedro Drive SE, Albuquerque, NM 87108
  - o Genomics Coordinating Center, Palo Alto – Philip S. Tsao, Ph.D.  
VA Palo Alto Health Care System, 3801 Miranda Avenue, Palo Alto, CA 94304
  - o MVP Boston Coordinating Center, Boston - J. Michael Gaziano, M.D., M.P.H.  
VA Boston Healthcare System, 150 S. Huntington Avenue, Boston, MA 02130
  - o MVP Information Center, Canandaigua – Brady Stephens, M.S.  
Canandaigua VA Medical Center, 400 Fort Hill Avenue, Canandaigua, NY 14424

### **Current MVP Local Site Investigators**

- Atlanta VA Medical Center (Peter Wilson, M.D.)  
1670 Clairmont Road, Decatur, GA 30033
- Bay Pines VA Healthcare System (Rachel McArdle, Ph.D.)  
10,000 Bay Pines Blvd Bay Pines, FL 33744
- Birmingham VA Medical Center (Louis Dellitalia, M.D.)  
700 S. 19th Street, Birmingham AL 35233
- Central Western Massachusetts Healthcare System (Kristin Mattocks, Ph.D., M.P.H.)  
421 North Main Street, Leeds, MA 01053
- Cincinnati VA Medical Center (John Harley, M.D., Ph.D.)  
3200 Vine Street, Cincinnati, OH 45220
- Clement J. Zablocki VA Medical Center (Jeffrey Whittle, M.D., M.P.H.)  
5000 West National Avenue, Milwaukee, WI 53295
- VA Northeast Ohio Healthcare System (Frank Jacono, M.D.)  
10701 East Boulevard, Cleveland, OH 44106
- Durham VA Medical Center (Jean Beckham, Ph.D.)  
508 Fulton Street, Durham, NC 27705
- Edith Nourse Rogers Memorial Veterans Hospital (John Wells., Ph.D.)  
200 Springs Road, Bedford, MA 01730
- Edward Hines, Jr. VA Medical Center (Salvador Gutierrez, M.D.)  
5000 South 5th Avenue, Hines, IL 60141
- Veterans Health Care System of the Ozarks (Kathrina Alexander, M.D.)

- 1100 North College Avenue, Fayetteville, AR 72703
- Fargo VA Health Care System (Kimberly Hammer, Ph.D.)  
2101 N. Elm, Fargo, ND 58102
- VA Health Care Upstate New York (James Norton, Ph.D.)  
113 Holland Avenue, Albany, NY 12208
- New Mexico VA Health Care System (Gerardo Villareal, M.D.)  
1501 San Pedro Drive, S.E. Albuquerque, NM 87108
- VA Boston Healthcare System (Scott Kinlay, M.B.B.S., Ph.D.)  
150 S. Huntington Avenue, Boston, MA 02130
- VA Western New York Healthcare System (Junzhe Xu, M.D.)  
3495 Bailey Avenue, Buffalo, NY 14215-1199
- Ralph H. Johnson VA Medical Center (Mark Hamner, M.D.)  
109 Bee Street, Mental Health Research, Charleston, SC 29401
- Columbia VA Health Care System (Roy Mathew, M.D.)  
6439 Garners Ferry Road, Columbia, SC 29209
- VA North Texas Health Care System (Sujata Bhushan, M.D.)  
4500 S. Lancaster Road, Dallas, TX 75216
- Hampton VA Medical Center (Pran Iruvanti, D.O., Ph.D.)  
100 Emancipation Drive, Hampton, VA 23667
- Richmond VA Medical Center (Michael Godschalk, M.D.)  
1201 Broad Rock Blvd., Richmond, VA 23249
- Iowa City VA Health Care System (Zuhair Ballas, M.D.)  
601 Highway 6 West, Iowa City, IA 52246-2208
- Eastern Oklahoma VA Health Care System (River Smith, Ph.D.)  
1011 Honor Heights Drive, Muskogee, OK 74401
- James A. Haley Veterans' Hospital (Stephen Mastorides, M.D.)  
13000 Bruce B. Downs Blvd, Tampa, FL 33612
- James H. Quillen VA Medical Center (Jonathan Moorman, M.D., Ph.D.)  
Corner of Lamont & Veterans Way, Mountain Home, TN 37684
- John D. Dingell VA Medical Center (Saib Gappy, M.D.)  
4646 John R Street, Detroit, MI 48201
- Louisville VA Medical Center (Jon Klein, M.D., Ph.D.)  
800 Zorn Avenue, Louisville, KY 40206
- Manchester VA Medical Center (Nora Ratcliffe, M.D.)  
718 Smyth Road, Manchester, NH 03104
- Miami VA Health Care System (Ana Palacio, M.D., M.P.H.)  
1201 NW 16th Street, 11 GRC, Miami FL 33125
- Michael E. DeBakey VA Medical Center (Olaoluwa Okusaga, M.D.)  
2002 Holcombe Blvd, Houston, TX 77030
- Minneapolis VA Health Care System (Maureen Murdoch, M.D., M.P.H.)  
One Veterans Drive, Minneapolis, MN 55417
- N. FL/S. GA Veterans Health System (Peruvemba Sriram, M.D.)  
1601 SW Archer Road, Gainesville, FL 32608
- Northport VA Medical Center (Shing Shing Yeh, Ph.D., M.D.)  
79 Middleville Road, Northport, NY 11768
- Overton Brooks VA Medical Center (Neeraj Tandon, M.D.)  
510 East Stoner Ave, Shreveport, LA 71101
- Philadelphia VA Medical Center (Darshana Jhala, M.D.)

- 3900 Woodland Avenue, Philadelphia, PA 19104
- Phoenix VA Health Care System (Samuel Aguayo, M.D.)  
650 E. Indian School Road, Phoenix, AZ 85012
- Portland VA Medical Center (David Cohen, M.D.)  
3710 SW U.S. Veterans Hospital Road, Portland, OR 97239
- Providence VA Medical Center (Satish Sharma, M.D.)  
830 Chalkstone Avenue, Providence, RI 02908
- Richard Roudebush VA Medical Center (Suthat Liangpunsakul, M.D., M.P.H.)  
1481 West 10th Street, Indianapolis, IN 46202
- Salem VA Medical Center (Kris Ann Oursler, M.D.)  
1970 Roanoke Blvd, Salem, VA 24153
- San Francisco VA Health Care System (Mary Whooley, M.D.)  
4150 Clement Street, San Francisco, CA 94121
- South Texas Veterans Health Care System (Sunil Ahuja, M.D.)  
7400 Merton Minter Boulevard, San Antonio, TX 78229
- Southeast Louisiana Veterans Health Care System (Joseph Constans, Ph.D.)  
2400 Canal Street, New Orleans, LA 70119
- Southern Arizona VA Health Care System (Paul Meyer, M.D., Ph.D.)  
3601 S 6th Avenue, Tucson, AZ 85723
- Sioux Falls VA Health Care System (Jennifer Greco, M.D.)  
2501 W 22nd Street, Sioux Falls, SD 57105
- St. Louis VA Health Care System (Michael Rauchman, M.D.)  
915 North Grand Blvd, St. Louis, MO 63106
- Syracuse VA Medical Center (Richard Servatius, Ph.D.)  
800 Irving Avenue, Syracuse, NY 13210
- VA Eastern Kansas Health Care System (Melinda Gaddy, Ph.D.)  
4101 S 4th Street Trafficway, Leavenworth, KS 66048
- VA Greater Los Angeles Health Care System (Agnes Wallbom, M.D., M.S.)  
11301 Wilshire Blvd, Los Angeles, CA 90073
- VA Long Beach Healthcare System (Timothy Morgan, M.D.)  
5901 East 7th Street Long Beach, CA 90822
- VA Maine Healthcare System (Todd Stapley, D.O.)  
1 VA Center, Augusta, ME 04330
- VA New York Harbor Healthcare System (Peter Liang, M.D., M.P.H.)  
423 East 23rd Street, New York, NY 10010
- VA Pacific Islands Health Care System (Daryl Fujii, Ph.D.)  
459 Patterson Rd, Honolulu, HI 96819
- VA Palo Alto Health Care System (Philip Tsao, Ph.D.)  
3801 Miranda Avenue, Palo Alto, CA 94304-1290
- VA Pittsburgh Health Care System (Patrick Strollo, Jr., M.D.)  
University Drive, Pittsburgh, PA 15240
- VA Puget Sound Health Care System (Edward Boyko, M.D.)  
1660 S. Columbian Way, Seattle, WA 98108-1597
- VA Salt Lake City Health Care System (Jessica Walsh, M.D.)  
500 Foothill Drive, Salt Lake City, UT 84148
- VA San Diego Healthcare System (Samir Gupta, M.D., M.S.C.S.)  
3350 La Jolla Village Drive, San Diego, CA 92161
- VA Sierra Nevada Health Care System (Mostaqul Huq, Pharm.D., Ph.D.)

975 Kirman Avenue, Reno, NV 89502

- VA Southern Nevada Healthcare System (Joseph Fayad, M.D.)  
6900 North Pecos Road, North Las Vegas, NV 89086
- VA Tennessee Valley Healthcare System (Adriana Hung, M.D., M.P.H.)  
1310 24th Avenue, South Nashville, TN 37212
- Washington DC VA Medical Center (Jack Lichy, M.D., Ph.D.)  
50 Irving St, Washington, D. C. 20422
- W.G. (Bill) Hefner VA Medical Center (Robin Hurley, M.D.)  
1601 Brenner Ave, Salisbury, NC 28144
- White River Junction VA Medical Center (Brooks Robey, M.D.)  
163 Veterans Drive, White River Junction, VT 05009
- William S. Middleton Memorial Veterans Hospital (Prakash Balasubramanian, M.D.)  
2500 Overlook Terrace, Madison, WI 53705
